# Supplementary material for: Prehabilitation, making patients fit for surgery – a new frontier in perioperative care
Source: PubMed Central journal article supplement (PMC8059351; doi:10.1515/iss-2019-0017), 2019-12-24
Supplement: iss-04-20190017-s001.pdf [file iss-04-20190017-s001.pdf]

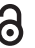

## Reviewer Assessment

Charlotte J.L. Molenaar, Nicole E. Papen-Botterhuis, Florian Herrle and Gerrit D. Slooter\*

# Prehabilitation, making patients fit for surgery – a new frontier in perioperative care

<https://doi.org/10.1515/iss-2019-0017>

Received December 9, 2019; accepted December 9, 2019

---

\*Corresponding author: Gerrit D. Slooter, Department of Surgical Oncology, Máxima MC, 5500MB, Veldhoven, the Netherlands,  
E-mail: g.slooter@mmc.nl, prehab.resurge@mmc.nl

## Editors' Comments to Original Submission and Final Decision

The contribution is not a scientific paper or a formal review, but it presents the current situation and findings on the subject of prehabilitation. It is of high quality and therefore it should be published in the current state.
